# Supplementary figures and images for: Treating Postprandial Hyperglycemia Does Not Appear to Delay Progression of Early Type 2 Diabetes
Source: Oxford University Press journal article supplement (doi:10.2337/dc06-0061), 2006-08-25

## Subject Flow Diagram, Early Diabetes Intervention Program

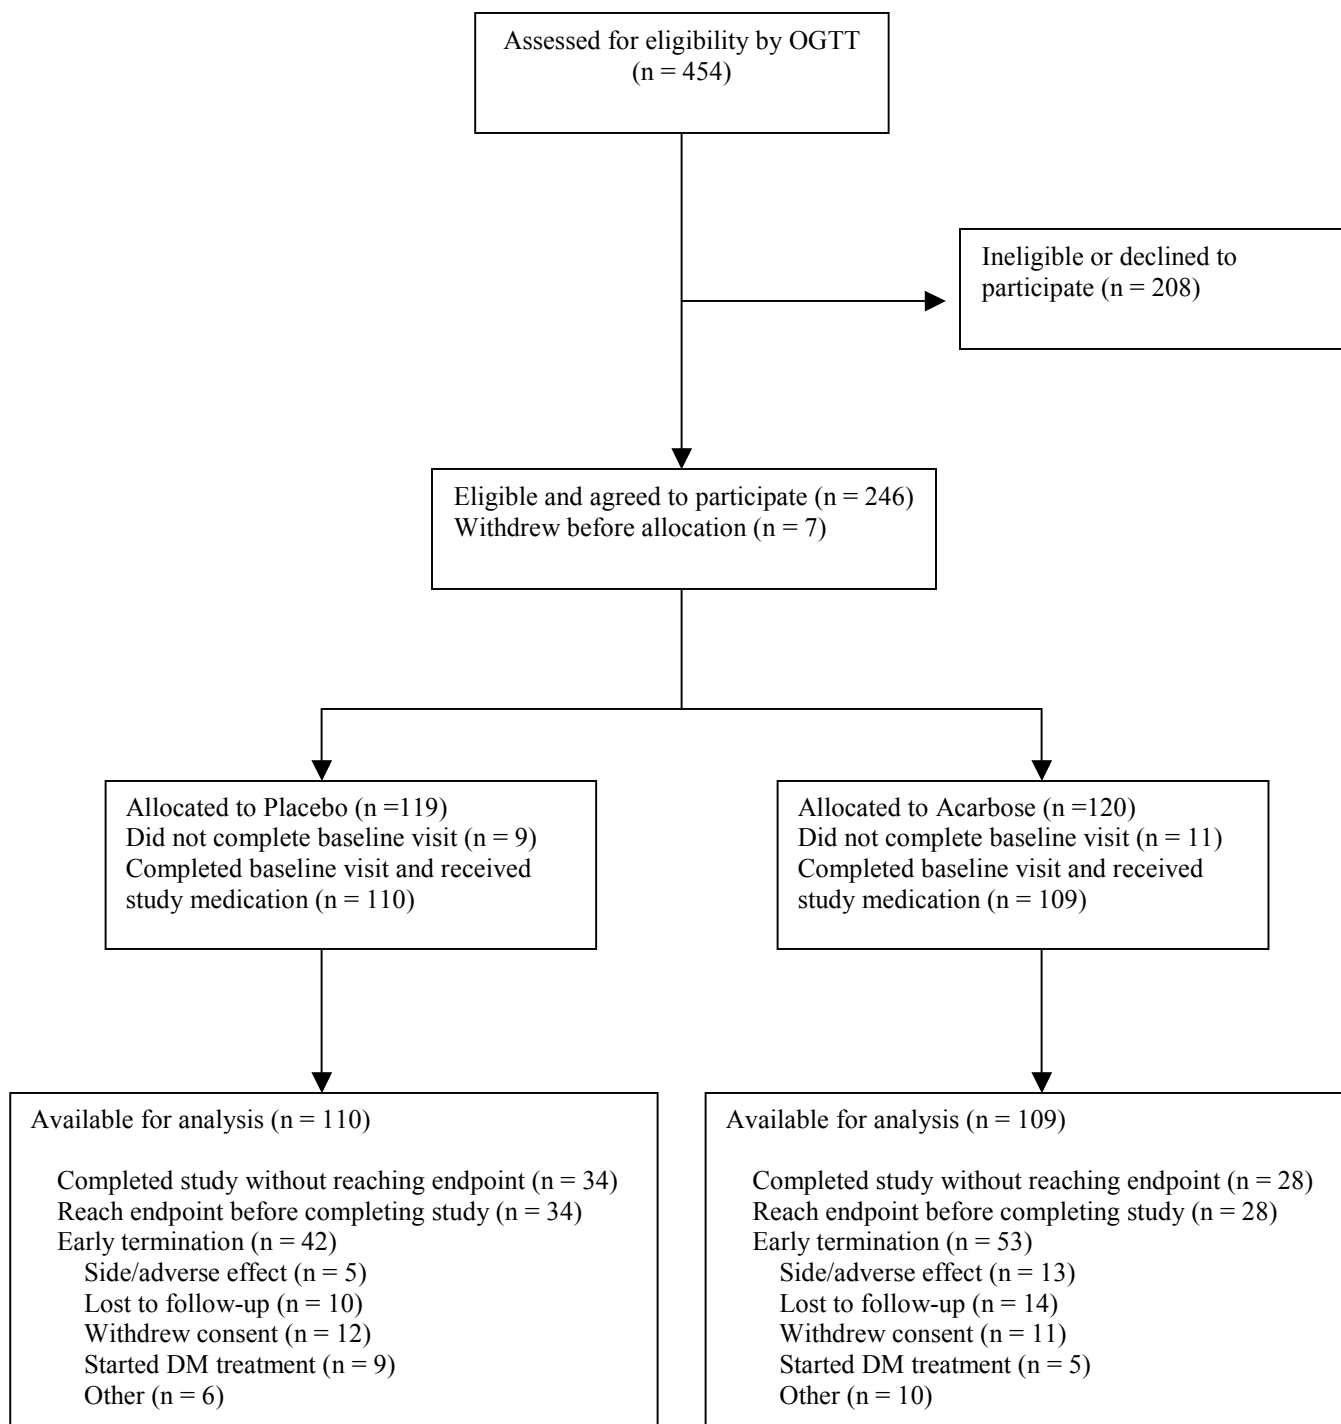

Supplement: pg2095onlineappendix.pdf [file pg2095onlineappendix.pdf]
